# Supplementary material
Source: publisher site journal article supplement (https://www.spandidos-publications.com/6678/downloadSupplementary)
Supplement: Supplementary file [file downloadSupplementary]

**Data S1.**

**Part A: The first form**

**Admission date:** \_\_\_ / \_\_\_ / 2022

**Age:** \_\_\_\_\_

**Sex:**  Male  Female

**Medical diagnosis:** \_\_\_\_\_

**Smoking:**  yes  No

**Outcomes:**

**Discharged with no complications**

**Suffer from complications**

Pneumonia

Acute respiratory distress syndrome (ARDS)

Multi-organ failure

Septic shock

Others: \_\_\_\_\_

Death

**Discharge date:** \_\_\_ / \_\_\_ / 2022

**Part B: The second form**

**PAST MEDICAL HISTORY**

Are there any previous conditions chronic and/or surgeries?

- |                                                |                                                  |
|------------------------------------------------|--------------------------------------------------|
| <input type="checkbox"/> Diabetes (Type _____) | <input type="checkbox"/> Heart murmur            |
| <input type="checkbox"/> Crohn's disease       | <input type="checkbox"/> High blood pressure     |
| <input type="checkbox"/> Pneumonia             | <input type="checkbox"/> Colitis                 |
| <input type="checkbox"/> High cholesterol      | <input type="checkbox"/> Pulmonary embolism      |
| <input type="checkbox"/> Anemia                | <input type="checkbox"/> Hypothyroidism          |
| <input type="checkbox"/> Asthma                | <input type="checkbox"/> Jaundice                |
| <input type="checkbox"/> Goiter                | <input type="checkbox"/> Emphysema               |
| <input type="checkbox"/> Hepatitis             | <input type="checkbox"/> Cancer (Type: _____)    |
| <input type="checkbox"/> Stroke                | <input type="checkbox"/> Stomach or peptic ulcer |
| <input type="checkbox"/> Leukemia              | <input type="checkbox"/> Epilepsy (seizures)     |
| <input type="checkbox"/> Rheumatic fever       | <input type="checkbox"/> Psoriasis               |
| <input type="checkbox"/> Cataracts             | <input type="checkbox"/> Tuberculosis            |
| <input type="checkbox"/> Angina                | <input type="checkbox"/> kidney disease          |
| <input type="checkbox"/> HIV/AIDS              | <input type="checkbox"/> Heart problems          |
| <input type="checkbox"/> Kidney stones         | <input type="checkbox"/> Surgery: _____          |

**Part C: The third form**

| Laboratory test results | <input type="checkbox"/> +ve | <input type="checkbox"/> -ve                                                                     |
|-------------------------|------------------------------|--------------------------------------------------------------------------------------------------|
| PCR swab for COVID-19:  |                              |                                                                                                  |
| Hgb                     |                              | <input type="checkbox"/> Normal<br><input type="checkbox"/> High<br><input type="checkbox"/> Low |
| RBCs count              |                              | <input type="checkbox"/> Normal<br><input type="checkbox"/> High<br><input type="checkbox"/> Low |
| WBCs count              |                              | <input type="checkbox"/> Normal<br><input type="checkbox"/> High<br><input type="checkbox"/> Low |
| PLT count               |                              | <input type="checkbox"/> Normal<br><input type="checkbox"/> High<br><input type="checkbox"/> Low |

|                                    |  |                                                                                                  |
|------------------------------------|--|--------------------------------------------------------------------------------------------------|
| MCV                                |  | <input type="checkbox"/> Normal<br><input type="checkbox"/> High<br><input type="checkbox"/> Low |
| MCH                                |  | <input type="checkbox"/> Normal<br><input type="checkbox"/> High<br><input type="checkbox"/> Low |
| MCHC                               |  | <input type="checkbox"/> Normal<br><input type="checkbox"/> High<br><input type="checkbox"/> Low |
| Serum iron                         |  | <input type="checkbox"/> Normal<br><input type="checkbox"/> High<br><input type="checkbox"/> Low |
| Transferrin                        |  | <input type="checkbox"/> Normal<br><input type="checkbox"/> High<br><input type="checkbox"/> Low |
| Ferritin                           |  | <input type="checkbox"/> Normal<br><input type="checkbox"/> High<br><input type="checkbox"/> Low |
| Total iron-binding capacity (TIBC) |  | <input type="checkbox"/> Normal<br><input type="checkbox"/> High<br><input type="checkbox"/> Low |
| Transferrin saturation (%)         |  | <input type="checkbox"/> Normal<br><input type="checkbox"/> High<br><input type="checkbox"/> Low |
